# Supplementary material for: Spontaneous magnetic merons in a half-metallic Mn2I3Br3 monolayer with easy-plane anisotropy
Source: Royal Society of Chemistry journal article supplement (doi:10.1039/d2cp03534k), 2022-01-01
Supplement: d2cp03534k1.pdf [file d2cp03534k1.pdf]

**Supplemental Information for "Spontaneous magnetic merons in half-metallic  
 $\text{Mn}_2\text{I}_3\text{Br}_3$  monolayer with easy-plane anisotropy"**

Zhong Shen,<sup>1</sup> Yufei Xue,<sup>1</sup> Zebin Wu,<sup>1</sup> and Changsheng Song<sup>1,2, a)</sup>

<sup>1</sup>*Key Laboratory of Optical Field Manipulation of Zhejiang Province,  
Department of Physics, Zhejiang Sci-Tech University, Hangzhou 310018,  
China*

<sup>2</sup>*Longgang Institute of Zhejiang Sci-Tech University, Wenzhou 325802,  
China*

(Dated: 24 September 2022)

---

<sup>a)</sup>[cssong@zstu.edu.cn](mailto:cssong@zstu.edu.cn)

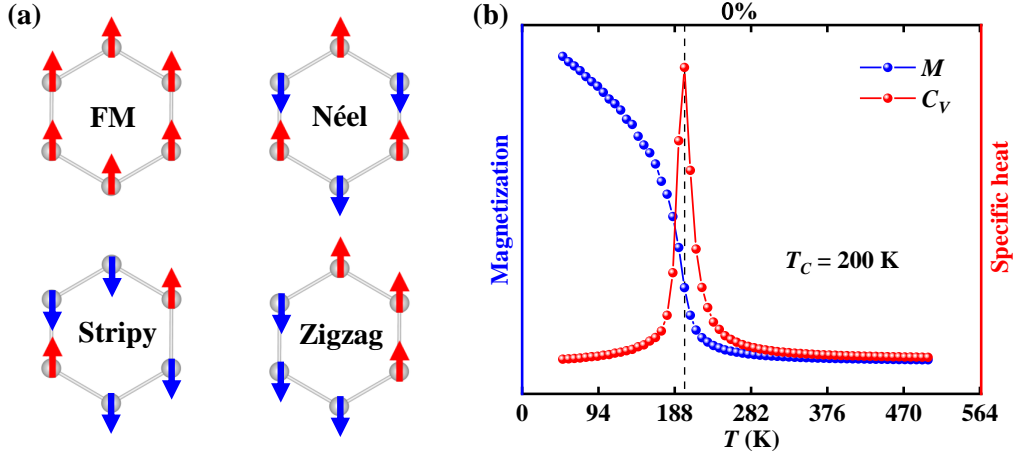

FIG. S1. (a) Schematic diagram of the four spin configurations used to extract the Heisenberg exchange coefficients  $J_1$ ,  $J_2$  and  $J_3$ . Red and blue arrows represent spin up (Z-direction) and down ( $-Z$ -direction), respectively. (b) Magnetic moment and specific heat capacity versus temperature of  $\text{Mn}_2\text{I}_3\text{Br}_3$  monolayer.

To obtain the Heisenberg exchange coefficients  $J_1$ ,  $J_2$  and  $J_3$ , we choose four spin configurations named *FM*, *Néel*, *Stripy* and *Zigzag* as shown in Fig. S1(a), with the energies being:

$$E_{FM} = -6J_1 - 12J_2 - 6J_3 + 4K(S^z)^2 + E_0, \quad (\text{S1})$$

$$E_{Néel} = 6J_1 - 12J_2 + 6J_3 + 4K(S^z)^2 + E_0, \quad (\text{S2})$$

$$E_{Stripy} = 2J_1 + 4J_2 - 6J_3 + 4K(S^z)^2 + E_0, \quad (\text{S3})$$

$$E_{Zigzag} = -2J_1 + 4J_2 + 6J_3 + 4K(S^z)^2 + E_0, \quad (\text{S4})$$

where  $J_1$ ,  $J_2$ ,  $J_3$  are the Heisenberg exchange coefficients of first, second and third nearest neighbor, respectively.  $K$  is the single ion anisotropy.  $S^z$  is the off-plane component of the normalized spin and  $E_0$  is the spin-independent energy. When the magnetic parameters are obtained, we perform Monte Carlo simulations with the Metropolis algorithm to evaluate the  $T_C$  of  $\text{Mn}_2\text{I}_3\text{Br}_3$  monolayer. As shown in Fig. S1(b), the  $T_C$  of intrinsic  $\text{Mn}_2\text{I}_3\text{Br}_3$  monolayer is about 200 K. The  $T_C$  with different strains can be found in Fig. S2

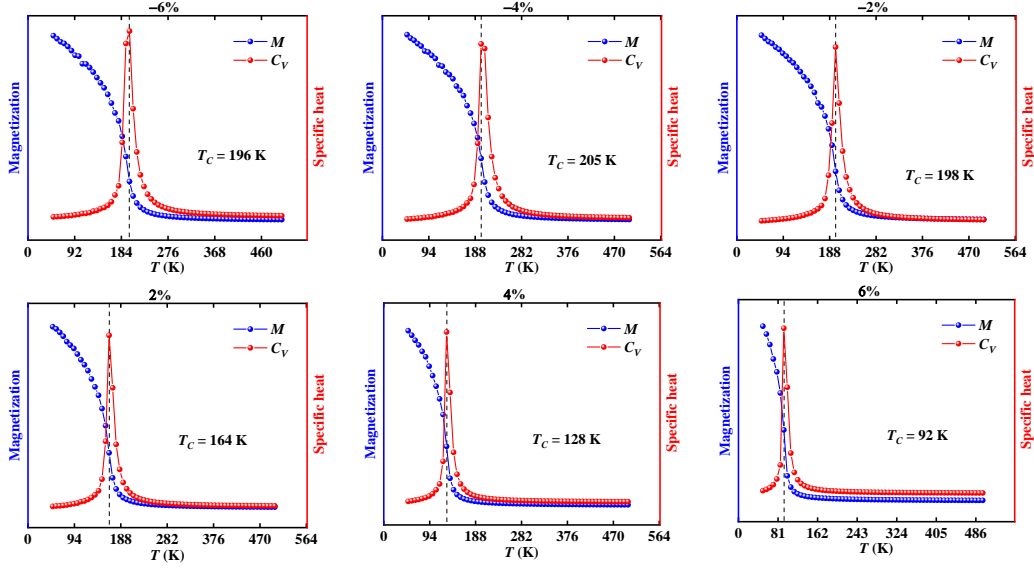

FIG. S2. Magnetic moment and specific heat capacity versus temperature of  $\text{Mn}_2\text{I}_3\text{Br}_3$  monolayer with different biaxial strains.

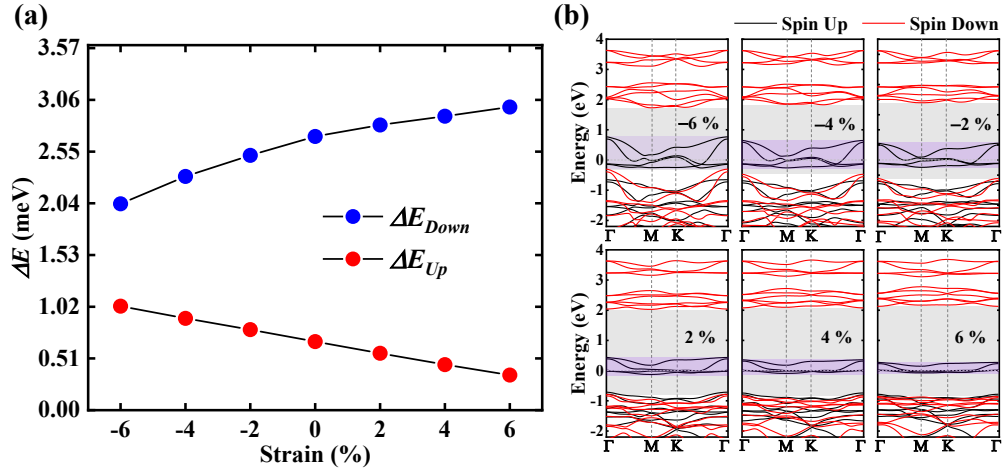

FIG. S3. (a) The band gap of spin down electrons ( $\Delta E_{Down}$ ) and band width of spin up electrons around Fermi level ( $\Delta E_{Up}$ ), and (b) band structures of  $\text{Mn}_2\text{I}_3\text{Br}_3$  with different strains.

As shown in Fig. S3(a), we illustrate the band gap of spin down electrons ( $\Delta E_{Down}$ ) and band width of spin up electrons around Fermi level ( $\Delta E_{Up}$ ) as functions of strains in  $\text{Mn}_2\text{I}_3\text{Br}_3$  monolayer. The band structures of  $\text{Mn}_2\text{I}_3\text{Br}_3$  with different strains are illustrated in Fig. S3(b) and  $\Delta E_{Up}$  ( $\Delta E_{Down}$ ) is marked by the purple (gray) shaded areas. It's clearly

seen that the half-metallic feature can be further enhanced by tensile strain due to the more localized spin-up channel around Fermi level and larger band gap of the spin-down channel.

TABLE S1. The optimized lattice constant  $a$ , Heisenberg exchange coefficients ( $J_1, J_2, J_3$ ), in-plane ( $d_{//}$ ) and off-plane ( $d_z$ ) components of DMI, single ion anisotropy ( $K$ ), the magnetic moments of Mn atoms and the  $T_C$  of  $\text{Mn}_2\text{I}_3\text{Br}_3$  monolayer with different strains.

| Strain (%)           | -6     | -4     | -2     | 0      | 2      | 4     | 6     |
|----------------------|--------|--------|--------|--------|--------|-------|-------|
| $a$ (Å)              | 6.24   | 6.38   | 6.51   | 6.64   | 6.77   | 6.91  | 7.04  |
| $J_1$ (meV)          | -13.37 | -16.16 | -15.42 | -14.28 | -8.40  | -4.57 | -1.68 |
| $J_2$ (meV)          | -1.05  | -1.36  | -2.10  | -2.60  | -3.46  | -3.38 | -3.04 |
| $J_3$ (meV)          | -7.43  | -5.74  | -4.33  | -3.85  | -2.23  | -1.51 | -0.98 |
| $d_{//}$ (meV)       | 1.68   | 1.91   | 2.38   | 3.00   | 3.71   | 3.99  | 3.83  |
| $d_z$ (meV)          | 1.07   | 1.20   | 1.46   | 1.81   | 2.19   | 2.31  | 2.18  |
| $K$ (meV)            | -13.15 | -12.47 | -10.88 | -9.95  | -10.02 | -9.33 | -7.75 |
| $M_{Mn}$ ( $\mu_B$ ) | 4.00   | 4.01   | 4.01   | 4.02   | 4.04   | 4.07  | 4.12  |
| $T_C$ (K)            | 196    | 205    | 198    | 200    | 164    | 128   | 93    |
